# Supplementary material
Source: PubMed Central journal article supplement (PMC3100289)
Supplement: NIHMS282045-supplement-1.pdf [file NIHMS282045-supplement-1.pdf]

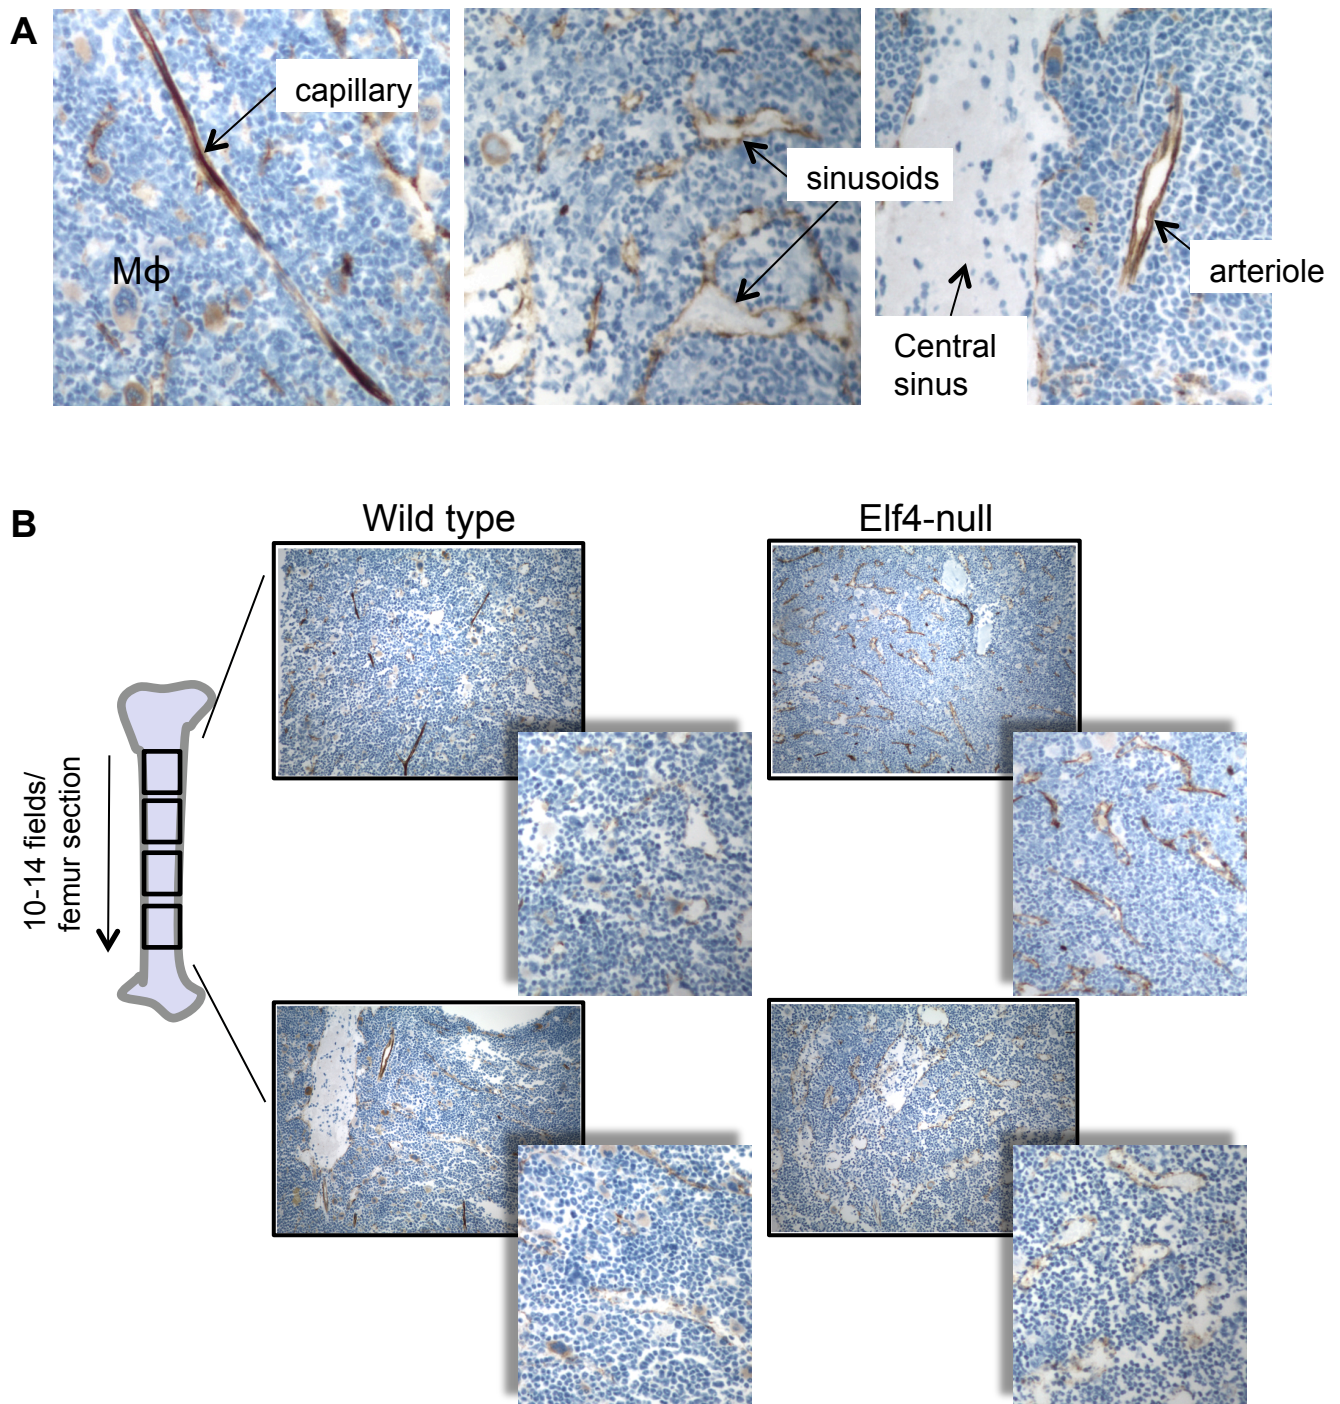

**Supplemental Figure 1. Identification of bone marrow vasculature by staining with MECA-32.** Mouse femurs were fixed, permeabilized, embedded in paraffin and stained with anti-MECA-32 as described in Methods. (A) Examples of MECA-32 expression in elongated capillaries and sinusoids. MECA32 is highly expressed in capillaries and arterioles. (B) Femurs were sectioned longitudinally and continuous sections along femurs were analyzed to enumerate sinusoids and capillaries using NIS-Element software. Representative images are shown, with higher magnification on the lower right.
