# Supplementary material
Source: PubMed Central journal article supplement (PMC3100289)
Supplement: NIHMS282045-supplement-2.pdf [file NIHMS282045-supplement-2.pdf]

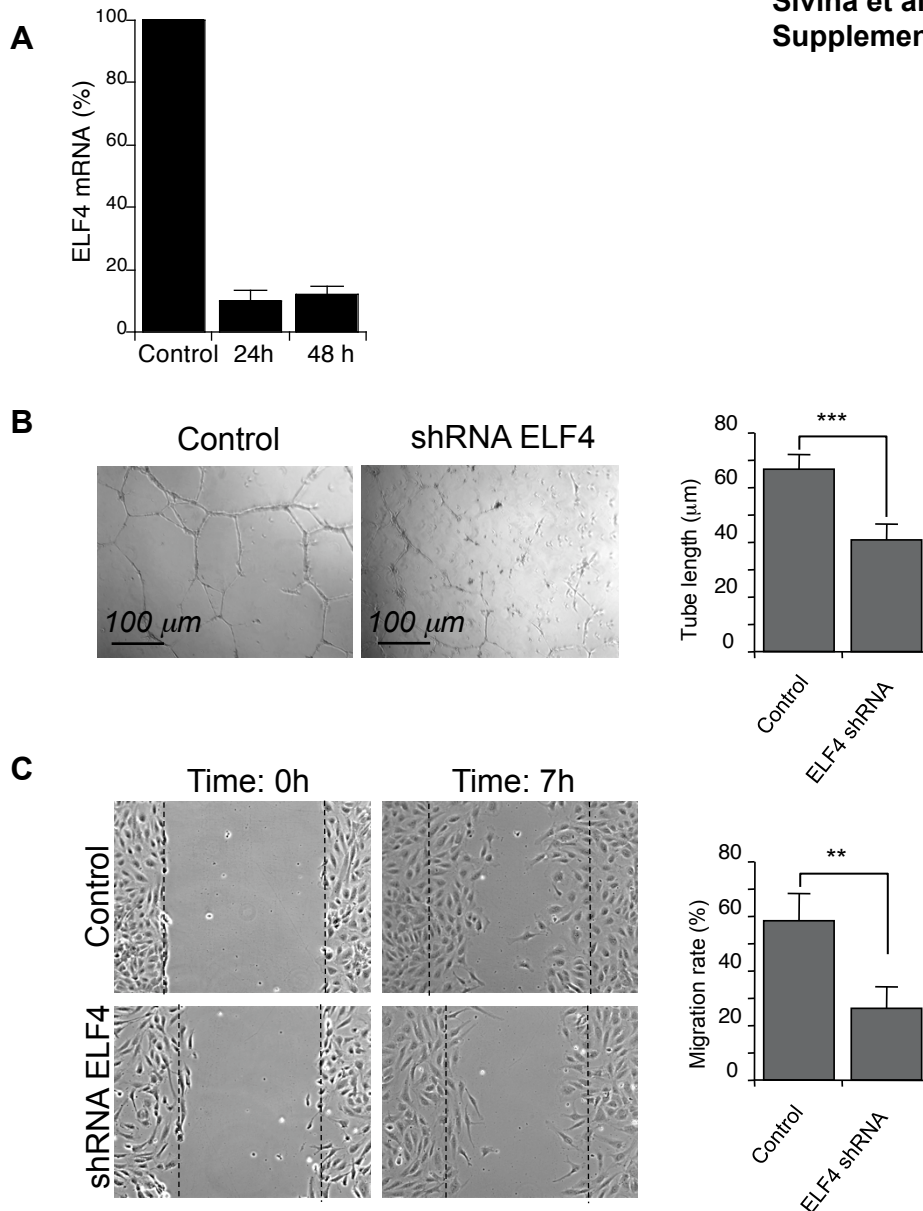

***In vitro* angiogenesis assays.** A. HUVEC cells were transfected with ELF4 Stealth Select RNAi and Stealth RNAi negative control and ELF4 expression was quantified by qPCR. B. Following 48 hours after silencing, a single wound was made in the center of cell monolayer. Phase contrast images were taken at different times on same area using a Nikon TE300 microscope. Migration rate was estimated by taking the width of wound before and after incubation (average of 4 different fields in three independent experiments). C. For tube formation, HUVEC cells were plated at a concentration of  $4.8 \times 10^4$  cells/well on Matrigel (BD Biosciences). Pictures were taken after 16-20 hours of incubation using an inverted microscope Nikon TE300. Quantitative analysis of tube length was performed using NI-Elements software (Nikon).
